# Supplementary material for: Participant Perceptions of Facilitators and Barriers to Adherence in a Digital Mental Health Intervention for a Nonclinical Cohort: Content Analysis
Source: PubMed Central journal article supplement (PMC8082377; doi:10.2196/25358), 2021-04-14
Supplement: jmir_v23i4e25358_app1.pdf [file jmir_v23i4e25358_app1.pdf]

## Live More Project – Program and experiential activity overview

| Week | Topic                                        | Overview                                                                                            | Daily experiential activity                                     | Weekly experiential activity                                      |
|------|----------------------------------------------|-----------------------------------------------------------------------------------------------------|-----------------------------------------------------------------|-------------------------------------------------------------------|
| 1    | Speak positively.                            | Introduction to limbic system, positive language.                                                   | Offer a genuine compliment.                                     | Memorise an inspirational text/saying.                            |
| 2    | Move dynamically.                            | Physical activity.                                                                                  | 30 minutes of moderate-intensity activity.                      | Perform resistance exercises (video provided).                    |
| 3    | Immerse in an uplifting natural environment. | Natural landscapes, light.                                                                          | Spend 30 minutes outside in natural light.                      | Watch a sunrise from an appealing location.                       |
| 4    | Immerse in a positive social environment.    | Positive relationships, forgiveness.                                                                | Perform an act of love for a person, using their love language. | Act of forgiveness or establish a new friendship.                 |
| 5    | Look to the positive.                        | Focus on positive, upward and downwards spirals.                                                    | Write down 3 things that went well.                             | Gratitude visit: write a letter, deliver and read to the person.  |
| 6    | Eat nutritiously.                            | Gut health, plant-based foods, fibre.                                                               | Eat eight fists full of fibre.                                  | Prepare and share a plant-based meal with one or more friends.    |
| 7    | Rest – sleep.                                | Sleep: 7-8 hours, blue light vs. yellow/orange light, factors affecting sleep.                      | Spend 8 hours in bed.                                           | Spend an evening by fire or candlelight.                          |
| 8    | Rest – from stress.                          | Strategies to de-stress, rest day, circaseptan rhythms.                                             | ‘Sit in silence’ mindful activity (15 mins).                    | Take a ‘guilt-free’ day off.                                      |
| 9    | Serve others.                                | Serving - emotionally uplifting, serve sustainably using signature strengths.                       | Perform one or more random acts of kindness.                    | Use significant strength to perform a significant act of service. |
| 10   | What does it take to flourish?               | Five areas to flourish: PEARM – Positive emotions, engagement, achievement, relationships, meaning. | Take time to engage in something you enjoy.                     | Create a list of goals and an action plan to achieve them.        |
